# Supplementary material for: A simple model for the behavior of multisite receptors in photochemical processes
Source: Royal Society of Chemistry journal article supplement (doi:10.1039/c4ra04045g), 2014-01-01
Supplement: c4ra04045g1.pdf [file c4ra04045g1.pdf]

## SUPPORTING INFORMATION

### Obtaining equation 8

Consider a solution containing two (or more) receptors that can interact with a fluorophore that can be quenched by a given species (quencher) present in the solution. These receptors in the present case are cyclodextrins, but the following treatment can be applied to other receptors, such as surfactant monomers and micelles, for example.

In the absence of a quencher, the intensity of emission of the fluorophore, in the presence of two cyclodextrins, CD<sub>1</sub> and CD<sub>2</sub>, would be:

$$(I_{em})_0 = \frac{(I_{em})_f + (I_{em})_1 K_1 [CD_1] + (I_{em})_2 K_2 [CD_2]}{1 + K_1 [CD_1] + K_2 [CD_2]} \quad S-1$$

In this equation  $(I_{em})_f$  corresponds to the emission intensity of the probe in the absence of receptors,  $(I_{em})_1$  to the situation in which all the probe molecules are bound to CD<sub>1</sub> and  $(I_{em})_2$  to CD<sub>2</sub>. This equation follows from the fact that the concentrations of free fluorophore and fluorophore bound to CD<sub>1</sub> and CD<sub>2</sub> are given by:

$$[R_f] = \frac{1}{1 + K_1 [CD_1] + K_2 [CD_2]} [R]$$
$$[R_1] = \frac{K_1 [CD_1]}{1 + K_1 [CD_1] + K_2 [CD_2]} [R] \quad S-2$$
$$[R_2] = \frac{K_2 [CD_2]}{1 + K_1 [CD_1] + K_2 [CD_2]} [R]$$

In the presence of a quencher,  $(I_{em})_Q = (I_{em})_{Qf} + (I_{em})_{Q1} + (I_{em})_{Q2}$  and consequently,

$$\frac{(I_{em})_0}{(I_{em})_Q} = \frac{(I_{em})_{0f} + (I_{em})_{01} + (I_{em})_{02}}{(I_{em})_{Qf} + (I_{em})_{Q1} + (I_{em})_{Q2}} \quad S-3$$

In this equation  $(I_{em})_{0f}$ ,  $(I_{em})_{01}$  and  $(I_{em})_{02}$  represent the emission intensities of  $R_f$ ,  $R_1$  and  $R_2$  in the absence of the quencher and  $(I_{em})_{Qf}$ ,  $(I_{em})_{Q1}$  and  $(I_{em})_{Q2}$  in the presence of the quencher.

Of course,

$$\frac{(I_{em})_{0i}}{(I_{em})_{Qi}} = 1 + (K_{SV})_i [Q] \quad i = f, 1, 2 \quad S-4$$

Thus

$$(I_{em})_{0i} = (I_{em})_{Qi} + (I_{em})_{Qi} (K_{SV})_i [Q] \quad i = f, 1, 2 \quad S-5$$

Introducing equation S-5 in equation S-3,

$$\frac{(I_{em})_0}{(I_{em})_Q} = 1 + \frac{(I_{em})_{Qf} (K_{SV})_f + (I_{em})_{Q1} (K_{SV})_1 + (I_{em})_{Q2} (K_{SV})_2}{(I_{em})_{Qf} + (I_{em})_{Q1} + (I_{em})_{Q2}} [Q] \quad S-6$$

Now,  $(I_{em})_{Qi}$  can be written as:

$$(I_{em})_{Qi} = \varepsilon_i l i_0 [R_i] \varphi_i \quad S-7$$

In this equation  $\varepsilon_i$  is the molar extinction coefficient of species  $i$ ,  $l$  is the light path length of the cuvette,  $i_0$  is the intensity of the incident beam on the sample and  $\varphi_i$  is the quantum yield for the emission of species  $i$ , in the presence of the quencher. Of course,  $[R_i]$  are given by equations S-2.

Introducing equations S-2 and S-7 in equation S-6 one obtains:

$$\begin{aligned}
\frac{(I_{em})_0}{(I_{em})_Q} &= 1 + \frac{\frac{1\varphi_f \varepsilon_f i_0 (K_{SV})_f}{1 + K_1[CD_1] + K_2[CD_2]} + \frac{1\varphi_1 \varepsilon_1 i_0 (K_{SV})_1 K_1[CD_1]}{1 + K_1[CD_1] + K_2[CD_2]} + \frac{1\varphi_2 \varepsilon_2 i_0 (K_{SV})_2 K_2[CD_2]}{1 + K_1[CD_1] + K_2[CD_2]}}{\frac{1\varphi_f \varepsilon_f i_0}{1 + K_1[CD_1] + K_2[CD_2]} + \frac{1\varphi_1 \varepsilon_1 i_0 K_1[CD_1]}{1 + K_1[CD_1] + K_2[CD_2]} + \frac{1\varphi_2 \varepsilon_2 i_0 K_2[CD_2]}{1 + K_1[CD_1] + K_2[CD_2]}} [Q] = \\
&= 1 + \frac{(K_{SV})_f + \left(\frac{a_1}{a_f}\right)(K_{SV})_1 K_1[CD_1] + \left(\frac{a_2}{a_f}\right)(K_{SV})_2 K_2[CD_2]}{1 + \left(\frac{a_1}{a_f}\right)K_1[CD_1] + \left(\frac{a_2}{a_f}\right)K_2[CD_2]} [Q]
\end{aligned}$$

S-8

with  $a_i = \varphi_i \varepsilon_i$ .

Thus, as

$$\frac{(I_{em})_0}{(I_{em})_Q} = 1 + (K_{SV})_{obs} [Q] \quad \text{S-9}$$

it results in

$$(K_{SV})_{obs} = \frac{(K_{SV})_f + \left(\frac{a_1}{a_f}\right)(K_{SV})_1 K_1[CD_1] + \left(\frac{a_2}{a_f}\right)(K_{SV})_2 K_2[CD_2]}{1 + \left(\frac{a_1}{a_f}\right)K_1[CD_1] + \left(\frac{a_2}{a_f}\right)K_2[CD_2]} \quad \text{S-10}$$

or

$$(K_{SV})_{obs} = \frac{(K_{SV})_f + (K_{SV})_1 (K_{app})_1 [CD_1] + (K_{SV})_2 (K_{app})_2 [CD_2]}{1 + (K_{app})_1 [CD_1] + (K_{app})_2 [CD_2]} \quad \text{S-11}$$

$$\left( (K_{app})_i = \left( \frac{a_i}{a_f} \right) K_i \right)$$

This is equation 8.
